# Supplementary material for: Eltrombopag for Adults and Children with Immune-Refractory Thrombocytopenic Purpura: A Systematic Review
Source: MDPI journal article supplement (doi:10.3390/jcm12123872), 2023-06-06
Supplement: s1 [file s1]

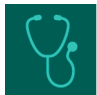

*Systematic Review*

# Eltrombopag for Adults and Children with Immune-Refractory Thrombocytopenic Purpura: A Systematic Review

## Supplemental material

### *Search strategy*

1. "immune thrombocytopenia".ab,ti,kw.
2. exp Purpura, Thrombocytopenic, Idiopathic/
3. exp Receptors, Thrombopoietin/ or Thrombopoiesis/ or Thrombopoietin/
4. thrombocytopeni\*.ab,ti,kw.
5. "Thrombopoietin Receptors".ab,ti,kw.
6. "Thrombopoie\*".ab,ti,kw.
7. Eltrombopag.ab,ti,kw. or Eltrombopag/
8. 1 or 2 or 3 or 4 or 5 or 6
9. (randomized or randomised).ab,ti.
10. placebo.ab,ti.
11. dt.fs.
12. randomly.ab,ti.
13. trial.ab,ti.
14. groups.ab,ti.
15. Animals/
16. Humans/
17. or/9-14
18. 15 not (15 and 16)
19. 17 not 18
20. 7 and 8 and 19

Table S1. Characteristics of the studies included in the analysis

| Study                   | Country                                                                                                                                                                                                                 | Sample characteristic                                                                                                                                                                           | Number of patients<br>with $<15,000/\text{mm}^3$ | Intervention/control group                                                                                                                                                                                                                                                                                                                                                   | Outcomes analyzed                                                                                                  | Duration        |
|-------------------------|-------------------------------------------------------------------------------------------------------------------------------------------------------------------------------------------------------------------------|-------------------------------------------------------------------------------------------------------------------------------------------------------------------------------------------------|--------------------------------------------------|------------------------------------------------------------------------------------------------------------------------------------------------------------------------------------------------------------------------------------------------------------------------------------------------------------------------------------------------------------------------------|--------------------------------------------------------------------------------------------------------------------|-----------------|
| Cheng et al., 2011 [22] | United States, Austria, Canada, China, Czech Republic, Denmark, Finland, France, Germany, Greece, India, Italy, Netherlands, New Zealand, Peru, Poland, Russian, Slovakia, Spain, Tunisia, Croatia, England and Vietnam | Total: 197 patients with ITP<br>Eltrombopag: $n = 135$ ; M, 42; F, 93; median age, 52.5 years (IQR, 43–63 years)<br>Placebo: $n = 62$ ; M, 19; F, 43; median age, 47.0 years (IQR, 34–56 years) | Placebo 30<br>Eltrombopag 67                     | Eltrombopag 50 mg/day; maximum dose, 75 mg/day (platelets $<50 \times 10^3/\text{mm}^3$ after day 22)<br>Platelets $>200 \times 10^3/\text{mm}^3$ : 25 mg/day<br>Platelets $>400 \times 10^3/\text{mm}^3$ : suspend<br>Week 6: platelets $>100 \times 10^3/\text{mm}^3$ in two consecutive weeks, reduce or discontinue treatment. Previous concomitant treatment<br>Placebo | Median platelet count<br>Clinically significant bleeding<br>Reduced or discontinued treatments<br>Rescue treatment | <b>6 months</b> |
| Bussel et al., 2015 [8] | 22 centers in the US, UK, Canada,                                                                                                                                                                                       | Total: 67 patients                                                                                                                                                                              | Placebo 11<br>Eltrombopag 23                     | Double blinded phase:                                                                                                                                                                                                                                                                                                                                                        | Platelet response for more than 6 weeks<br>Need for rescue therapy                                                 | <b>24 weeks</b> |

| Study                    | Country                                                                                                                           | Sample characteristic                                                                                                                                                                             | Number of patients               | Intervention/control group                                                                                                                                                                                                                                             | Outcomes analyzed                                                                                                                                                                                                                                                       | Duration |
|--------------------------|-----------------------------------------------------------------------------------------------------------------------------------|---------------------------------------------------------------------------------------------------------------------------------------------------------------------------------------------------|----------------------------------|------------------------------------------------------------------------------------------------------------------------------------------------------------------------------------------------------------------------------------------------------------------------|-------------------------------------------------------------------------------------------------------------------------------------------------------------------------------------------------------------------------------------------------------------------------|----------|
|                          |                                                                                                                                   | with <15,000/mm <sup>3</sup>                                                                                                                                                                      |                                  |                                                                                                                                                                                                                                                                        |                                                                                                                                                                                                                                                                         |          |
|                          | Spain, France, and the Netherlands                                                                                                | Eltrombopag: <i>n</i> = 45; M, 18; F, 27; median age, 9 years (IQR, 8–10 years)<br><br>Placebo: <i>n</i> = 22; M, 9; F, 13; median age, 10 years (IQR, 8–12 years)                                |                                  | 12–17 years: 37.5 mg/day (initial dose)<br><br>6–11 years: ≥27 kg, 50 mg/day (25 mg Asians) ; <27 kg, 25 mg/day (12.5 mg Asians)<br><br>1–5 years: 1.5 mg/kg/day (0.8 mg/kg/day Asians)<br><br>Placebo: GlaxoSmithKline                                                | Clinically significant bleeding (WHO grades 2–4)<br><br>Grade 3 or greater bleeding events<br><br>Grade 3 or 4 adverse events                                                                                                                                           |          |
| Bussel et al., 2009 [23] | 23 centers: Germany, Greece, China, Korea, New Zealand, Pakistan, Poland, Romania, Russia, Slovenia, Thailand, England and Taiwan | Total: 114 patients<br><br>Eltrombopag: <i>n</i> = 76; M, 33; F, 43; median age, 47 years (IQR, 19–84 years)<br><br>Placebo: <i>n</i> = 38; M, 27; F, 11; median age, 51 years (IQR, 21–79 years) | Placebo 17<br><br>Eltrombopag 38 | Eltrombopag (GlaxoSmithKline, Ware, UK) 50 mg/day<br><br>Platelets <50 × 10 <sup>3</sup> /mm <sup>3</sup> after 3 weeks: increase dose to 75 mg/day<br><br>Platelets >200 × 10 <sup>3</sup> /mm <sup>3</sup> : discontinue<br><br>Placebo: GlaxoSmithKline for 6 weeks | Platelet counts: ≥50 × 10 <sup>3</sup> /mm <sup>3</sup> and at least twice the baseline value:<br><br>Eltrombopag: 42 (58%)<br><br>Placebo: 5 (14%)<br><br>Bleeding symptoms:<br><br>Eltrombopag: 20 (39%)<br><br>Placebo: 18 (60%)<br><br>Grade 3 or 4 adverse events: | 6 weeks  |

| Study                    | Country                                                                                                                 | Sample characteristic                                                                                                                                                                                                                                                                              | Number of patients<br>with <15,000/mm <sup>3</sup>                                 | Intervention/control group                                                                                      | Outcomes analyzed                                                                                                                                                                                                                                                                                                                                                                                                                               | Duration |
|--------------------------|-------------------------------------------------------------------------------------------------------------------------|----------------------------------------------------------------------------------------------------------------------------------------------------------------------------------------------------------------------------------------------------------------------------------------------------|------------------------------------------------------------------------------------|-----------------------------------------------------------------------------------------------------------------|-------------------------------------------------------------------------------------------------------------------------------------------------------------------------------------------------------------------------------------------------------------------------------------------------------------------------------------------------------------------------------------------------------------------------------------------------|----------|
|                          |                                                                                                                         |                                                                                                                                                                                                                                                                                                    |                                                                                    |                                                                                                                 | Eltrombopag: 2 (3%)<br>Placebo: 1 (3%)                                                                                                                                                                                                                                                                                                                                                                                                          |          |
| Bussel et al., 2007 [24] | 44 centers: Germany, Greece, China, Korea, New Zealand, Pakistan, Poland, Romania, Russia, Slovenia, Thailand, England) | Total: 117 patients<br>Eltrombopag 30 mg: <i>n</i> = 30; M, 14; F, 16; median age, 51 years (IQR, 23–79 years)<br>Eltrombopag 50 mg: <i>n</i> = 30; M, 9; F, 21; median age, 45 years (IQR, 23–81 years)<br>Eltrombopag 75 mg: <i>n</i> = 28; M, 8; F, 20; median age, 55 years (IQR, 18–85 years) | Placebo 14<br>Eltrombopag 30 mg 15<br>Eltrombopag 50 mg 12<br>Eltrombopag 70 mg 15 | Received placebo or eltrombopag 30, 50, or 75 mg<br>Withhold treatment if platelet count >200 × 10 <sup>9</sup> | Platelet count ≥50 × 10 <sup>3</sup> /mm <sup>3</sup> :<br>Eltrombopag 75 mg: 21(81%)<br>Eltrombopag 50 mg: 19 (70%)<br>Eltrombopag 30 mg: 8 (28%)<br>Placebo: 3 (11%)<br>Incidence of bleeding events:<br>Eltrombopag 75 mg: 8 (4%)<br>Eltrombopag 50 mg: 2 (7%)<br>Eltrombopag 30 mg: 5 (17%)<br>Placebo: 4 (14%)<br>Adverse effects (grades 3 and 4)<br>Eltrombopag 75 mg: 3 (11%)<br>Eltrombopag 50 mg: 4(13%)<br>Eltrombopag 30 mg: 2 (7%) | 6 weeks  |

| Study                     | Country                                                                                                                             | Sample characteristic                                                                                                                                                                    | Number of patients<br>with <15,000/mm <sup>3</sup> | Intervention/control group                                                                                                                                                                                                                                                                                                                                                                                     | Outcomes analyzed                                                                                                                                                                                                             | Duration    |
|---------------------------|-------------------------------------------------------------------------------------------------------------------------------------|------------------------------------------------------------------------------------------------------------------------------------------------------------------------------------------|----------------------------------------------------|----------------------------------------------------------------------------------------------------------------------------------------------------------------------------------------------------------------------------------------------------------------------------------------------------------------------------------------------------------------------------------------------------------------|-------------------------------------------------------------------------------------------------------------------------------------------------------------------------------------------------------------------------------|-------------|
|                           |                                                                                                                                     | Placebo: $n = 29$ ; M, 13; F, 16; median age, 42 years (IQR, 18–85 years)                                                                                                                |                                                    |                                                                                                                                                                                                                                                                                                                                                                                                                | Placebo: 4 (14%)                                                                                                                                                                                                              |             |
| Grainger et al., 2015 [9] | 38 centers in 12 countries (Argentina, Czech Republic, Germany, China, Israel, Italy, Russia, Spain, Taiwan, Thailand, UK, and USA) | Total: 92 patients<br>Eltrombopag: $n = 63$ ; M, 33; F, 30; median age, 9.4 years (IQR, 8.2–10.5 years)<br>Placebo: $n = 29$ ; M, 15; F, 14; median age, 9.8 years (IQR, 8.3–11.3 years) | Placebo 19<br>Eltrombopag 38                       | Eltrombopag:<br>1–5 years: 1.2 mg/kg/day (0.8 mg/kg/day for East Asian patients)<br>6–11 years: $\geq 27$ kg, started treatment at 50 mg/day (25 mg/day for East Asian patients); <27 kg, started treatment at 37.5 mg/day (25 mg/day for East Asian patients)<br>12–17 years: $\geq 27$ kg, 50 mg/day (25 mg/day for East Asian patients); <27 kg, 37.5 mg/day (25 mg/day for East Asian patients)<br>Placebo | Platelet count $> 50 \times 10^3/\text{mm}^3$ :<br>Eltrombopag 25 (40%)<br>Placebo 1 (3%)<br>Bleeding grades 2–4:<br>Eltrombopag 3 (5%)<br>Placebo 2 (7%)<br>Serious adverse events:<br>Eltrombopag 5 (8%)<br>Placebo 4 (14%) | 24–28 weeks |

| Study                             | Country | Sample characteristic                                                                                                                                                                                                                                                                                    | Number of patients<br>with <15,000/mm <sup>3</sup> | Intervention/control group                                                                                                                                                                                                  | Outcomes analyzed                                                                                                                                                                                                                                                             | Duration        |
|-----------------------------------|---------|----------------------------------------------------------------------------------------------------------------------------------------------------------------------------------------------------------------------------------------------------------------------------------------------------------|----------------------------------------------------|-----------------------------------------------------------------------------------------------------------------------------------------------------------------------------------------------------------------------------|-------------------------------------------------------------------------------------------------------------------------------------------------------------------------------------------------------------------------------------------------------------------------------|-----------------|
| <b>Liu et al.,<br/>2020 [25]</b>  | China   | Total: 150 patients<br><br>Eltrombopag: <i>n</i> = 100; M,<br>27, F, 73; median age, 45<br>years (SD 15.9 years)<br><br>Placebo: <i>n</i> = 50; M, 11; F,<br>38; median age, 40.9<br>years (SD, 12.65 years)<br><br>Placebo: <i>n</i> = 50; M, 11; F,<br>38; median age, 40.9 years<br>(SD, 12.65 years) | Not specified                                      | Eltrombopag: 25 mg/day<br><br>(modified or suspended dose<br>according to platelet value)<br><br>If platelets <50 × 10 <sup>9</sup> , increase the<br>dose by 25 mg, reaching a<br>maximum dose of 75 mg day<br><br>Placebo | Platelet count >50 × 10 <sup>3</sup> /mm <sup>3</sup> :<br><br>Eltrombopag 38 (38%)<br><br>Placebo 10 (20%)<br><br>Grade 2 to 4 bleeding:<br><br>Eltrombopag 13 (13%)<br><br>Placebo 3 (6%)<br><br>Serious adverse events:<br><br>Eltrombopag 11 (11%)<br><br>Placebo 6 (12%) | <b>24 weeks</b> |
| <b>Yang et al.,<br/>2016 [26]</b> | China   | Total: 155 patients<br><br>Eltrombopag: <i>n</i> = 104; M,<br>27 F, 77; median age, 48<br>years (IQR, 18–84 years)                                                                                                                                                                                       | Placebo 28<br><br>Eltrombopag 54                   | Eltrombopag: 25 mg for 8 weeks<br><br>(maximum 75 mg day)<br><br>Placebo<br><br>Stage II: Patients who received<br>eltrombopag in Stage I<br>continued on the dose                                                          | Platelet count >50 × 10 <sup>3</sup> /mm <sup>3</sup> :<br><br>Eltrombopag 60 (57.7%)<br><br>Placebo 3 (6%)<br><br>WHO grade 2-4 bleeding:<br><br>Eltrombopag 14 (13.5%)<br><br>Placebo 6 (11.5%)                                                                             | <b>8 weeks</b>  |

| Study                             | Country | Sample characteristic                                                          | Number of patients<br>with <15,000/mm <sup>3</sup> | Intervention/control group                                                                                                                             | Outcomes analyzed                                                                                                                 | Duration        |
|-----------------------------------|---------|--------------------------------------------------------------------------------|----------------------------------------------------|--------------------------------------------------------------------------------------------------------------------------------------------------------|-----------------------------------------------------------------------------------------------------------------------------------|-----------------|
| <b>Tomiyama et al., 2012 [27]</b> | Japan   | Placebo: <i>n</i> = 51; M, 11; F, 40; median age, 42 years (IQR, 22–66 years)  |                                                    | administered at the end of stage I, patients who received placebo in stage I started active treatment with an initial dose of 25 mg of eltrombopag day | Serious adverse events:<br>Eltrombopag 5 (4.8%)<br>Placebo 5 (9.8%)                                                               |                 |
|                                   |         | Total: 23 patients                                                             | Placebo 6                                          | Phase 1: double-blind, randomized, placebo-controlled phase of 6 weeks                                                                                 | Platelet count >50 × 10 <sup>3</sup> /mm <sup>3</sup> :<br>Eltrombopag 9 (60%)<br>Placebo 0 (0%)                                  | <b>26 weeks</b> |
|                                   |         | Eltrombopag: <i>n</i> = 15; M, 7 F, 8; median age, 58 years (IQR, 26–72 years) | Eltrombopag 3                                      | Phase 2: open label for 6 weeks                                                                                                                        | Any adverse events:                                                                                                               |                 |
|                                   |         | Placebo <i>n</i> = 8; M, 1 F, 7; Median age 60.5 years (IQR:38-72)             |                                                    | Eltrombopag 12.5 mg/day (maximum dose 50 mg/day)<br>Placebo 25 mg/day                                                                                  | Eltrombopag 11 (6%)<br>Placebo 2 (1%)                                                                                             |                 |
| <b>Huang et al., 2018 [28]</b>    | China   | Total: 35 patients ≥18 years                                                   | Placebo 6<br>Eltrombopag 3                         | If platelets <50 × 10 <sup>9</sup> /L: increase dose 25 mg (with a maximum of 75 mg) platelets (150–250) × 10 <sup>9</sup> /L: reduce to the nearest   | Platelet count >50 × 10 <sup>3</sup> /mm <sup>3</sup> :<br>Eltrombopag 11 (64%)<br>Placebo 2 (11.1%)<br>Use of rescue medication: | <b>6 weeks</b>  |

| Study | Country | Sample characteristic                                                                                                                                                                                  | Number of patients<br>with <15,000/mm <sup>3</sup> | Intervention/control group                                                                                                                                                                                                                                                    | Outcomes analyzed                                                                                                                                                         | Duration |
|-------|---------|--------------------------------------------------------------------------------------------------------------------------------------------------------------------------------------------------------|----------------------------------------------------|-------------------------------------------------------------------------------------------------------------------------------------------------------------------------------------------------------------------------------------------------------------------------------|---------------------------------------------------------------------------------------------------------------------------------------------------------------------------|----------|
|       |         | <p><b>Eltrombopag: <i>n</i> = 17; M, 2; F, 15; median age, 50 years (IQR, 24–62 years)</b></p> <p><b>Placebo: <i>n</i> = 18; M, 4; F, 14; median age, 39.5 years (IQR, 22–66 years); 25 mg/day</b></p> |                                                    | <p><b>lower dose (example: 50 mg/day to 25 mg/day), or reduce the frequency of the dose (example: 25 mg/day to 25 mg once every 2 days). If platelets &gt;250 × 10<sup>9</sup>/L, stop the drug and resume taking the drug after platelets &lt;100 × 10<sup>9</sup>/L</b></p> | <p><b>Eltrombopag 0 (0%)</b></p> <p><b>Placebo 8 (44.4%)</b></p> <p><b>Adverse events: bleeding:</b></p> <p><b>Eltrombopag 0 (0%)</b></p> <p><b>Placebo 4 (22.2%)</b></p> |          |

ITP, immune thrombocytopenic purpura; M, male; F, female; IQR, interquartile range.
